# Supplementary material for: The potential of taxation records as a data source for historical climatology
Source: Copernicus journal article supplement (doi:10.5194/egusphere-2025-2942), 2025-06-27
Supplement: Supplementary file [file egusphere-2025-2942-AC2-supplement.pdf]

First, I would like to thank the editors of *Climate of the Past* for asking me to review this very interesting article, which uses previously unpublished documentary archives as a source for historical climatology in Europe. The authors are highly qualified climate historians, and the subject of the article is very much in line with some of the themes explored by the journal. This article is the third analysis of historical-climatological orientation from southwestern Bohemia (Czech Republic) published by the same authors in CfP in recent years.

**RESPONSE:** We would like to thank Nicolas Maughan for the reviewing of our study with many comments, which we are trying to respond below.

**General comments:**

- Paragraph “2.4 Climatic data”: this section could perhaps be expanded with a few sentences to provide a more detailed description of the climatic context during the period studied in Central Europe. The same comment applies to Figure 10 and text from line 353 to 359.

In this section, the authors could have used the powerful new tool called ClimeApp (<https://mode-ra.unibe.ch/climeapp/>) to produce an additional figure, map or time series to show precipitation or temperature anomalies during this period. It is a web-based tool for processing paleoclimate data, presenting temperature, precipitation, and pressure reconstructions from 1422 to 2008 CE (based on ModE-RA & ModE-RAclim global climate reanalysis). This tool is very easy to use.

**RESPONSE:** Of course, we know about ModE-RA reanalysis (Valler et al., 2024, <https://doi.org/10.1038/s41597-023-02733-8>), presenting among others gridded reconstructions of temperature and precipitation over Europe. But having corresponding temperature and precipitation reconstructions for the Czech Lands, presented in Fig. 10, we do not see as useful to use Valler et al. paleoclimate reconstruction for Central Europe, because it uses among basic series also our Czech temperature and precipitation reconstructions by Dobrovolný et al. (2010, 2015), i.e. it represents not independent data source.

- The use of administrative documentation connected with requests for tax relief from peasants in southwestern Bohemia during the 17th–19th centuries (to identify extreme weather events and establish a chronology) is a very good idea. Indeed, these documentary archives can serve as an important source of data for historical climatology at regional level.

**RESPONSE:** We agree with the reviewers about importance of tax relief data for historical climatology on the regional level.

- The method used (part 3) enabled a total of 2,134 records to be collected from the period 1655 to 1827 CE and, even after eliminating data relating to fires (unrelated to weather), this remains a substantial dataset (posted online by the authors). The 1,107 individual taxation records related to weather damage (this dataset was further complemented by another dataset from documentary sources) were classified into four categories and analyzed individually, followed by a comprehensive analysis of damaging weather events over the period 1655–1827 CE. This methodology is rigorous and allows the data to be presented in a clear and highly visual manner.

**RESPONSE:** Many thanks for the positive evaluation of the used methodology.

- It is a real shame that due to the lack of data during certain periods, 1708–1747 and 1806–1813 CE (5.1 Data uncertainty, lines 363 to 365) “*This also applies to institutional evidence represented in this study by taxation records, which is particularly reflected in data gaps between 1708 and 1747 CE and further in the years 1806–1813 CE*”, the consequences of

extreme climatic events such as the famous winters of 1709 and 1740 could not be analyzed in the Prácheň Region.

**RESPONSE:** The two famous severe winters 1708/09 and 1739/40 CE occurred in the period not covered by taxation data. Moreover, potential impact of “freezing of winter crops” caused by hard frosts or long lying snow, as mentioned e.g. for 1751 or 1758 CE in Sect. 4.1.4, were not among meteorological phenomena, with which was possible to argue for tax alleviation. But there exist other documentary sources (particularly chronicles) from the studied region or other locations in Bohemia, in which above two extreme winters were reported.

- Paragraph 5.1 concerning data uncertainty in the use of documentary evidence in historical-climatological research is important and very welcome, as it highlights the obstacles to the use of documentary archives. The description of these problems associated with the use of documentary archives, which are well known to historians but less so to other academic disciplines, is important because it allows the advantages and disadvantages of the extracted data to be identified. This facilitates communication between history, geography and geosciences in the broad sense, making it possible to correct and supplement incomplete data (such as early meteorological records) with the help of other disciplines and to build solid interdisciplinary studies in climate history.

**RESPONSE:** Many thanks for the positive evaluation of data uncertainty.

- The article is well structured, organized in a traditional manner around six sections. It is written in good quality English. The figures and maps are clear and very well presented. The bibliography is exhaustive and very recent, drawing on the most relevant works on the subject, with many of the articles cited relating to similar case studies from other countries around the world.

**RESPONSE:** Many thanks for the positive evaluation of our paper.

### **Specific questions about the documentary archives used:**

- In the abstract, and then in the text, the same information is given about the type of event, the damages, taken into account in the registers and when they began to be taken into account: (abstract, line 12-14) : *“based on the first land registry system, only hailstorm damage to crops and fires qualified peasants for tax relief from 1655 CE, while the subsequent land registry system from 1748 CE extended this to include water damage from 1775 CE.”*

(2.2 Taxation system and data, line 119-120): *“From 1775 CE, the reporting of key events for tax alleviation was extended from fire and hailstorm to also include water damage.”*

If I understand correctly, a new registry system was created in 1748 but did not begin recording water damages until 1775. Do the authors know why it was decided to record this damage only from 1775 onwards and not from 1748? Perhaps because a more turbulent climate period (increased rainfall) in southwestern Bohemia would have considerably increased damage to crops and made it necessary to take this into account in order to help the population? This is not specified and would benefit from some clarification for readers.

**RESPONSE:** You are true, that a new registry system involved in 1748 CE took in account again only hailstorms and fires for tax relief and water damage as a reason for such relief was involved as far as from 1775 CE. Although some attempts for extension of considered hydrometeorological events (like windstorms, severe frosts, floods) appeared several times from the beginning of the 18th century, finally they were not accepted. We may only speculate that it could have been limited by available volume of financial sources (188,000 guildens) for compensation of damage. Although in the 1750s water damage was identified among very frequent cases, not any reasons for its later involving in Bohemia from 1775 CE were mentioned.

- The information provided about the damage assessment process (2.2 Taxation system and data, lines 84–91, and figure 2) is particularly interesting because it presents a mechanism that was almost identical to one that existed during the same period in the ‘States of Provence’ (South-eastern France) in the 17th and 18th centuries. After a natural disaster, rural communities (peasants) would submit requests, known as “requests for assistance from rural communities”, to the central administration of Provence.

These requests for tax relief were assessed on the same principle as that described in the Czech Republic and also represent a very rich source of data (a huge corpus of documentary archives) for climate history in South-eastern France, which is currently being studied. The authors accurately refer to these tax exemptions, sometimes temporary, for certain regions of France ("5.2.2 International context. lines 417 to 421), but their scope was much greater and the requests were very regular, especially in the mountainous areas of the south-east of the country (southern part of the French Alps), which are prone to extreme climatic events and intense soil erosion (it is a pity that French data are never taken into account in European studies...). Overall, this section is very well constructed and provides many examples of systems of tax reduction or exemption that have been used around the world to infer precipitation levels or document the economic impacts of droughts.

**RESPONSE:** Thanks for your comments concerning of similar data from South-eastern France. The fact mentioned by the reviewer, “that French data are never taken into account in European studies”, can be perhaps related to publishing such papers in French language, when its poor knowledge among scientists could be an obstacle for the use and citing of such papers.

- I assume that there are two main types of documents (according to Figure 2): the request from the community affected by damage, the "report", and a ‘control’ document specifically from the regional administration's inspection, in which it is also possible to find information on the actual extent of the damage?

In the case of South-eastern France, where a similar process existed, the information in these "inspection" documents is very interesting because analysing it allows us to identify certain communities that had a bad habit of regularly overestimating the damage or even requesting tax exemptions for disasters that had not occurred... (like false insurance claims today...).

These communities eventually became known to the authorities... Of course, this was not the case for the majority of claims made after a disaster.

Thus, it is possible to eliminate or downplay some specific weather events and thus obtain a more reliable data set. Could the authors have carried out similar work with the documents available in the Prácheň Region?

**RESPONSE:** As follows from our study related to taxation records in South Moravia (south-eastern part of the Czech Lands), reports of damage from individual communities sent to the Regional office were checked in situ by office authorities. In this evidence appeared sometimes cases, when an original request on tax relief from community was significantly reduced (see e.g. Brázdil and Valášek, 2003), but we did not find that it concerned systematically only one or any particular communities. Concerning of Bohemia, reports of caused damage were submitted by landlord's office to the Regional office and its authority checked it in situ and determined a measure of damage. This system eliminated potential overestimation of the damage caused. Because our recent study used such data on the level of the Regional office or *Gubernium*, not directly from individual communities, we could not identify communities “regularly overestimating the damage or even requesting tax exemptions for disasters that had not occurred” as in South-eastern France.

- The periods of the major volcanic eruptions of Laki (1783) and Tambora (1815) are covered by the available archives, but they are not mentioned at all in the article (just as an example in Sweden). Is this because it is not possible to highlight their local climatic consequences based on the information provided by the documents analysed?

**RESPONSE:** Climatic and socioeconomic consequences of Laki and Tambora eruptions were analyzed by Brázdil et al. (2017): Climatic and other responses to the Lakagígar 1783 and Tambora 1815 volcanic eruptions in the Czech Lands, <https://doi.org/10.37040/geografie2017122020147>. Concerning of damage records in the Prácheň Region from the years of the eruption and several subsequent years, there were no direct indications of potential volcanic effects. It was a reason, that both eruptions were not particularly mentioned in our recent study.

- It is a pleasure to read a well-structured article such as this one. The methodology used could certainly serve as a model applicable in other countries in Europe (such as France) or Asia where similar documentary archives exist. I therefore recommend its publication in Cfp after a few minor revisions.

**RESPONSE:** Thank you for your positive evaluation.

#### **Comments for minor revisions:**

- Section “2.4 Climatic data” needs to be expanded slightly.

**RESPONSE:** Please see our response concerning of the use of ModE-RA reanalysis (Valler et al., 2024) above. We believe, that the use of temperature and precipitation reconstructions for the Czech Lands (Dobrovolný et al., 2010, 2015) gives a valuable information expected by the reviewer.

- A few sentences should be added to the conclusion “perspectives”, for example regarding similar documents available in other regions of the Czech Republic that could be studied for historical climatology in the future.

**RESPONSE:** Accepted, the following paragraph was complemented to Conclusion as a new point (iv) in the following form:

“(iv) While until now a systematic research of taxation records for the study of damaging hydrometeorological extremes in the Czech Lands concerned only South Moravia, the analysis of the same datasets for the Prácheň Region shows importance of these data also for Bohemia. Although the work with taxation data represents extremely time-consuming work, it opens their enormous future potential for significant extension of knowledge related to hydrometeorological extremes and their socioeconomic impacts during 17th–19th centuries over the whole Czech Republic.”

- It would be useful to add some geographical details to the maps in Figure 9 and in the legend, such as the name of the Prácheň Region.

**RESPONSE:** Accepted, please see the new version of Fig. 9 below.

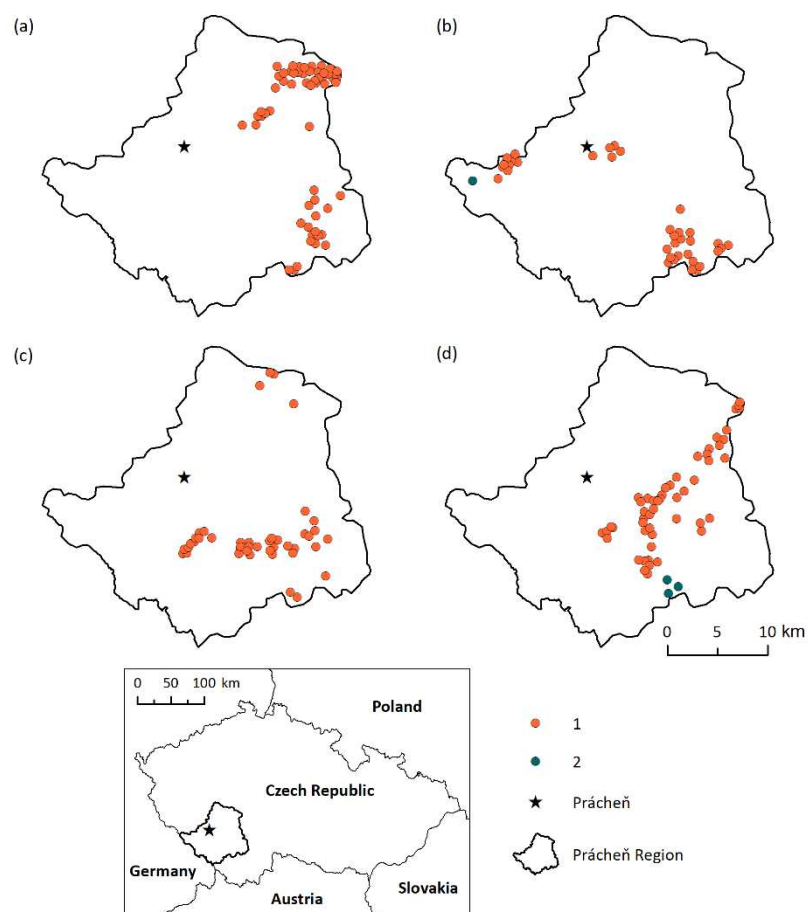

Figure 9. Spatial extent of four outstanding damaging weather events with the highest number of affected municipalities: (a) 15 June 1758, (b) 13 July 1763, (c) 21 June 1765, (d) 31 July 1779; 1 – hail damage, 2 – hail and water torrent damage.
